# Supplementary material for: A mechanochemical process to capture and separate carbon dioxide from natural gas using boron nitride nanosheets
Source: Royal Society of Chemistry journal article supplement (doi:10.1039/d4mh00188e), 2024-01-01
Supplement: d4mh00188e1.pdf [file d4mh00188e1.pdf]

ARTICLE

## The mechanochemical process to capture carbon dioxide gas and separate from natural gas with boron nitride nanosheets.

Received 00th January 20xx,  
Accepted 00th January 20xx

DOI: 10.1039/x0xx00000x

Srikanth Mateti<sup>1</sup>, Ying (Ian) Chen<sup>1\*</sup>, Gautham Sathikumar<sup>1</sup>, Qi Han<sup>2</sup>, Shiva Prasad<sup>1</sup>, Reza Ghandehari Ferdowsi<sup>1</sup>, Amrito Battacharjee<sup>1</sup>

<sup>1</sup>Institute for Frontier Materials, Deakin University, Waurn Ponds, 3216, Victoria, Australia.

<sup>2</sup>School of Science, STEM college, RMIT University, 124 La Trobe Street, Melbourne, Vic 3000, Australia.

E-mail: \*Correspondence to Ying (Ian) Chen ([ian.chen@deakin.edu.au](mailto:ian.chen@deakin.edu.au)), Srikanth Mateti ([s.mateti@deakin.edu.au](mailto:s.mateti@deakin.edu.au))

---

<sup>a</sup> Address here.

<sup>b</sup> Address here.

<sup>c</sup> Address here.

† Footnotes relating to the title and/or authors should appear here.

Electronic Supplementary Information (ESI) available: [details of any supplementary information available should be included here]. See DOI: 10.1039/x0xx00000x

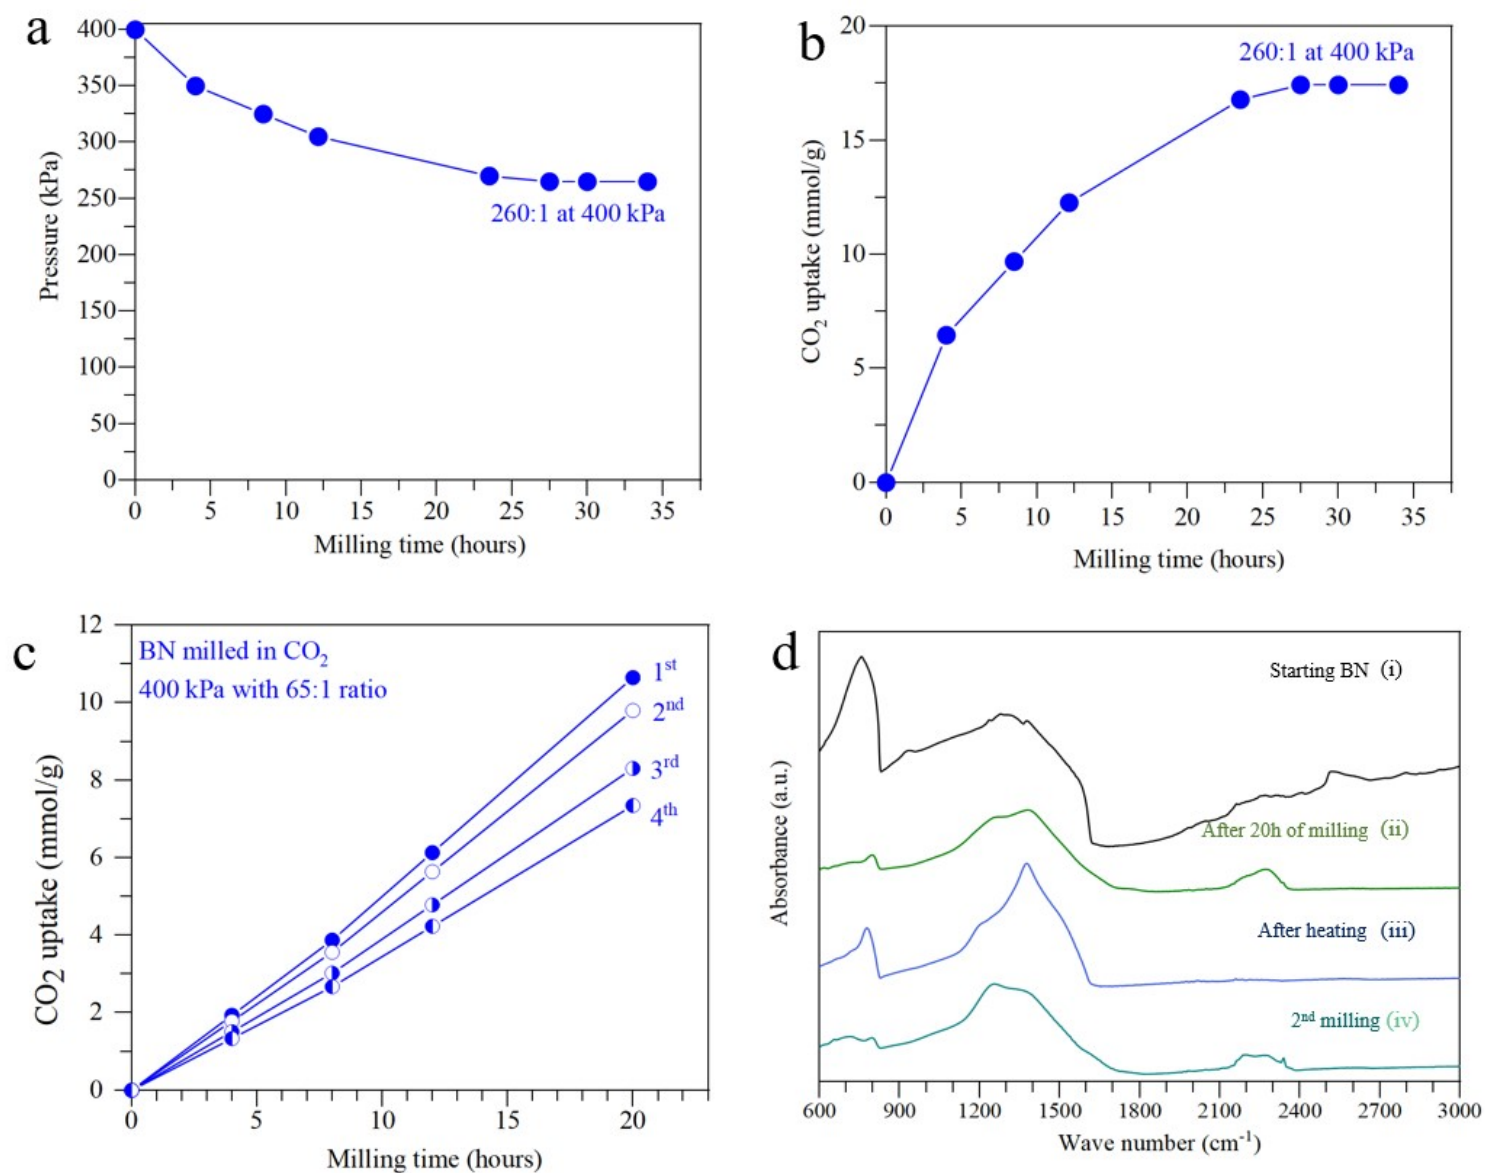

Figure S1: Maximum adsorption capacity with 1 g of BN: a) pressure drop curve b) uptake capacity 1 gram of BN milled in CO<sub>2</sub>. (c) the uptake of CO<sub>2</sub> by BN during milling of (1) fresh BN in CO<sub>2</sub> (1) and (2) heated BN and repeated 2<sup>nd</sup> cycle and 3<sup>rd</sup> and 4<sup>th</sup> cycles. (d) FTIR spectra of the initial BN powder and the BN samples after milling and heating treatments.

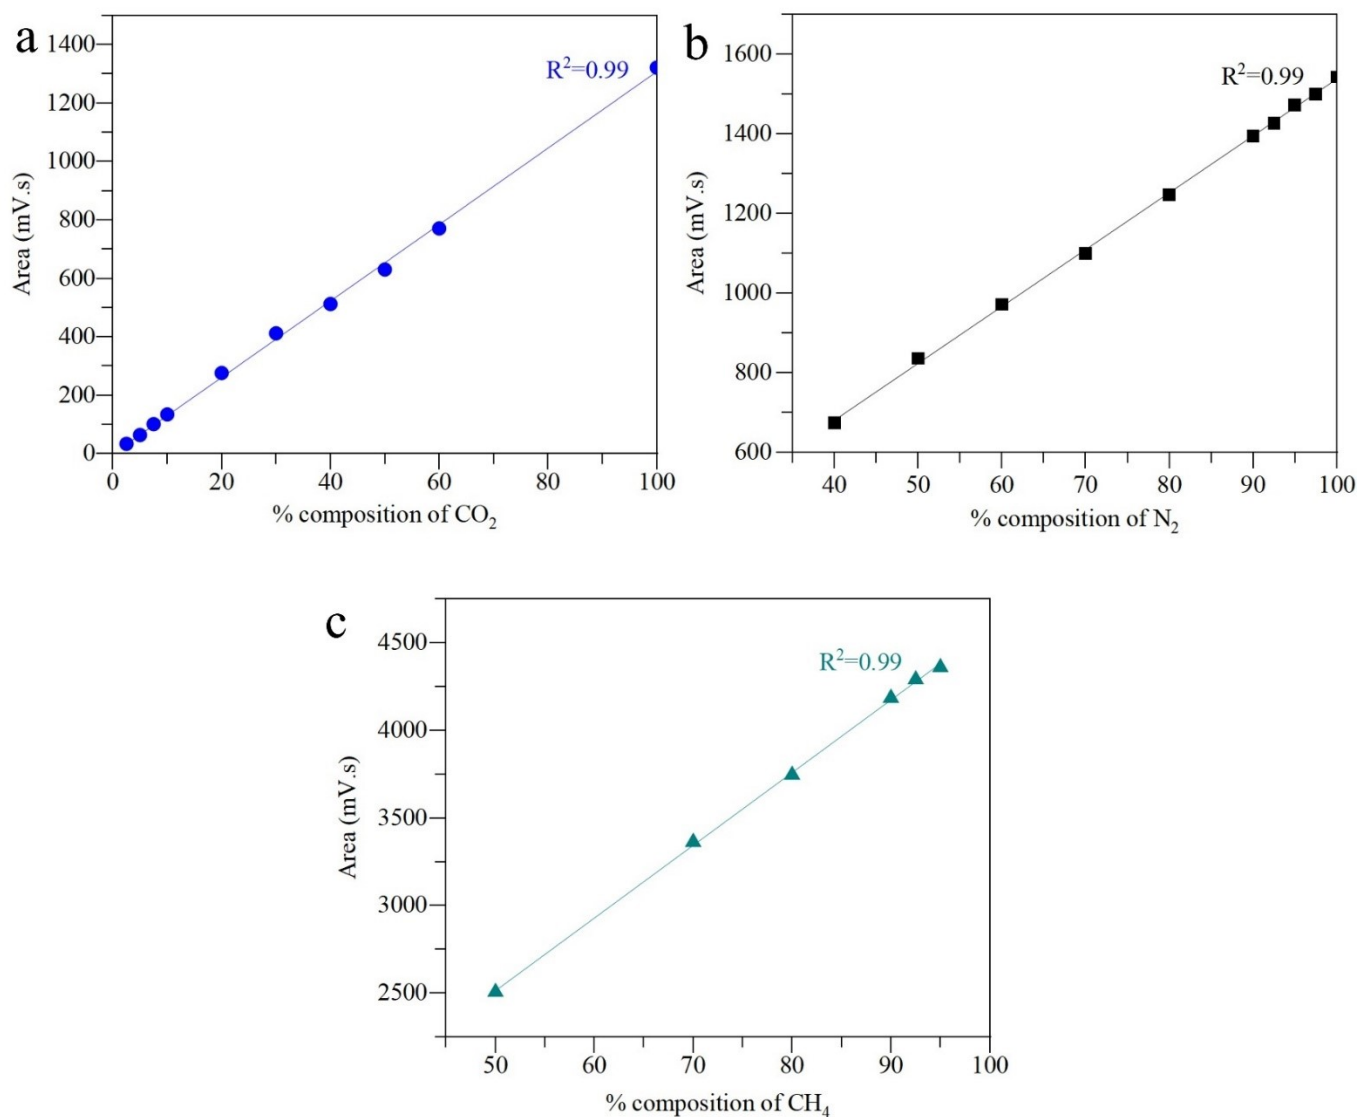

Figure S2: Calibration of different amounts of gases using gas-chromatography (a) CO<sub>2</sub>, (b) N<sub>2</sub>, (c) CH<sub>4</sub>.

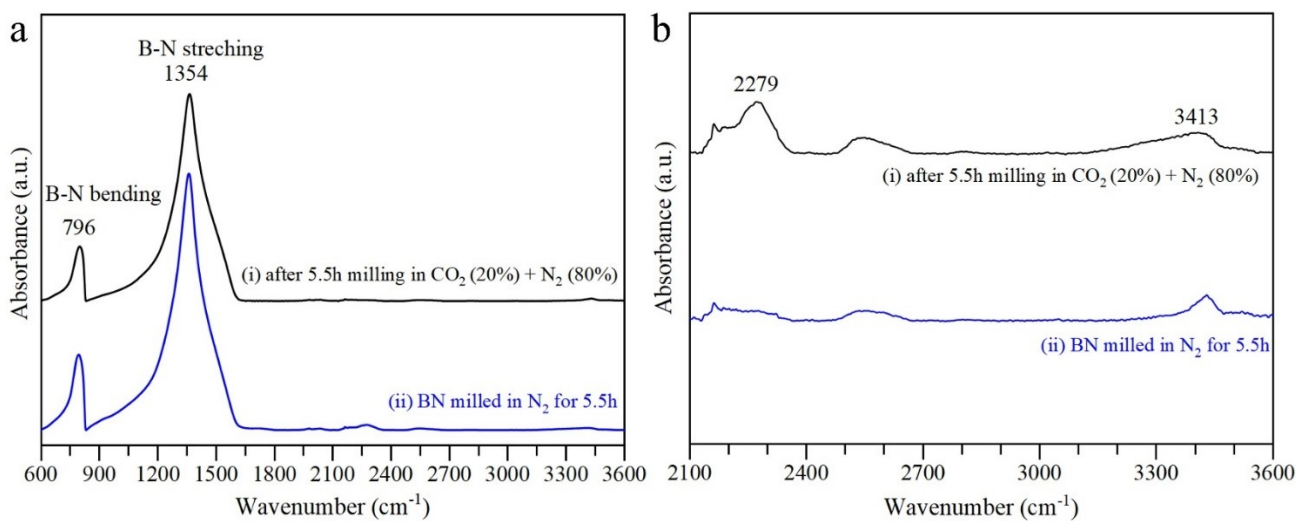

Figure S3: FTIR spectra of the BN milled for 5.5 hours in a mixture gas of CO<sub>2</sub>+N<sub>2</sub> (i) and in N<sub>2</sub> (ii); (b) Enlarged spectra of the same.

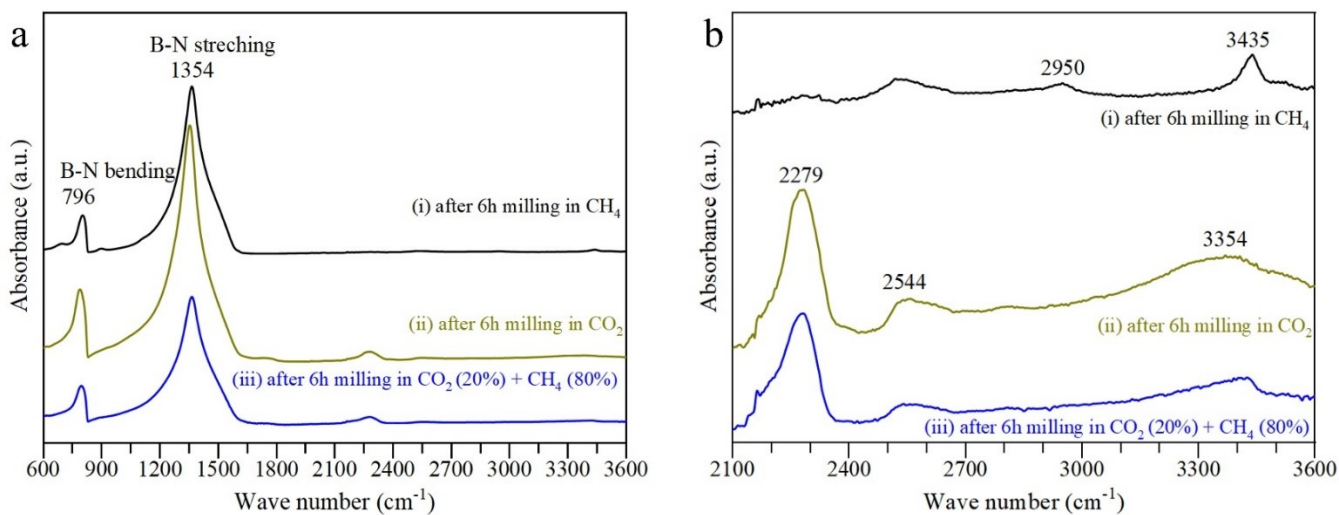

Figure S4: (a) FTIR spectra of the BN milled for 4 hours in CH<sub>4</sub> (i) and CO<sub>2</sub> (ii), and mixture gas of CO<sub>2</sub>+CH<sub>4</sub> (iii). (b) Enlarged spectra of the same.

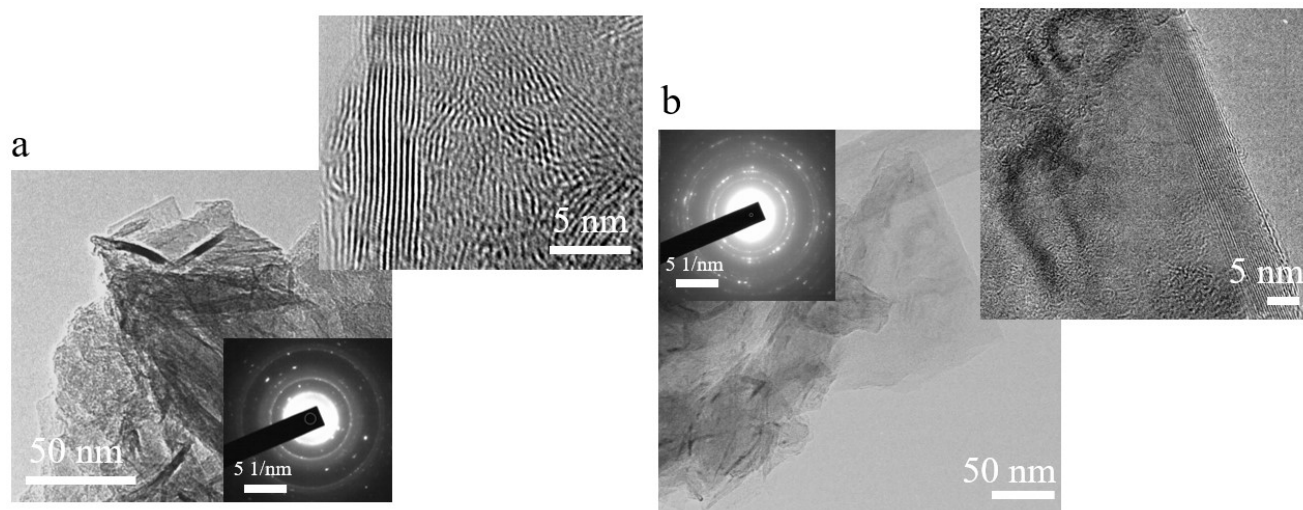

Figure S5: TEM images of the BN milled (for 6 hours) in a mixture gas of  $\text{CO}_2+\text{CH}_4$  (a) and mixture gas of  $\text{CO}_2+\text{N}_2$  (b); inset: SAED patterns.

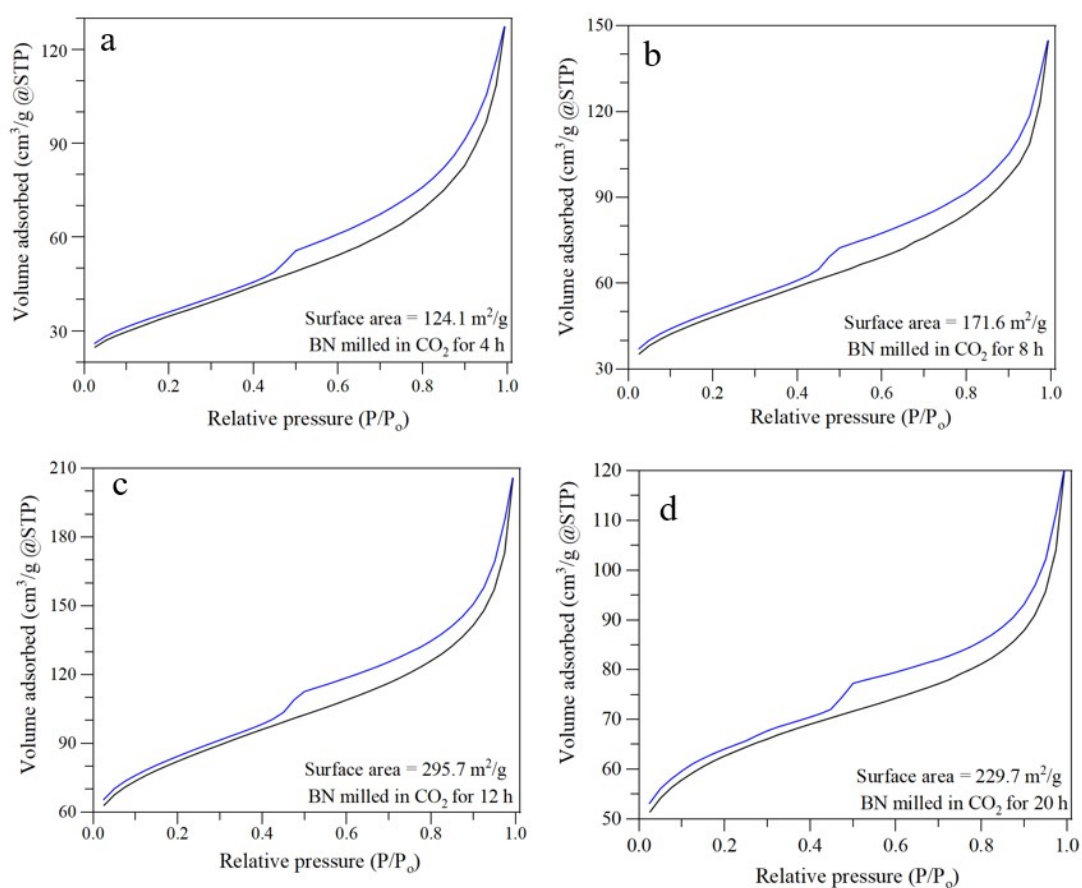

Figure S6: Nitrogen isotherms of BN milled in  $\text{CO}_2$  for different time intervals, 4h (a) 8h (b); (c) 12h, 20h (d).

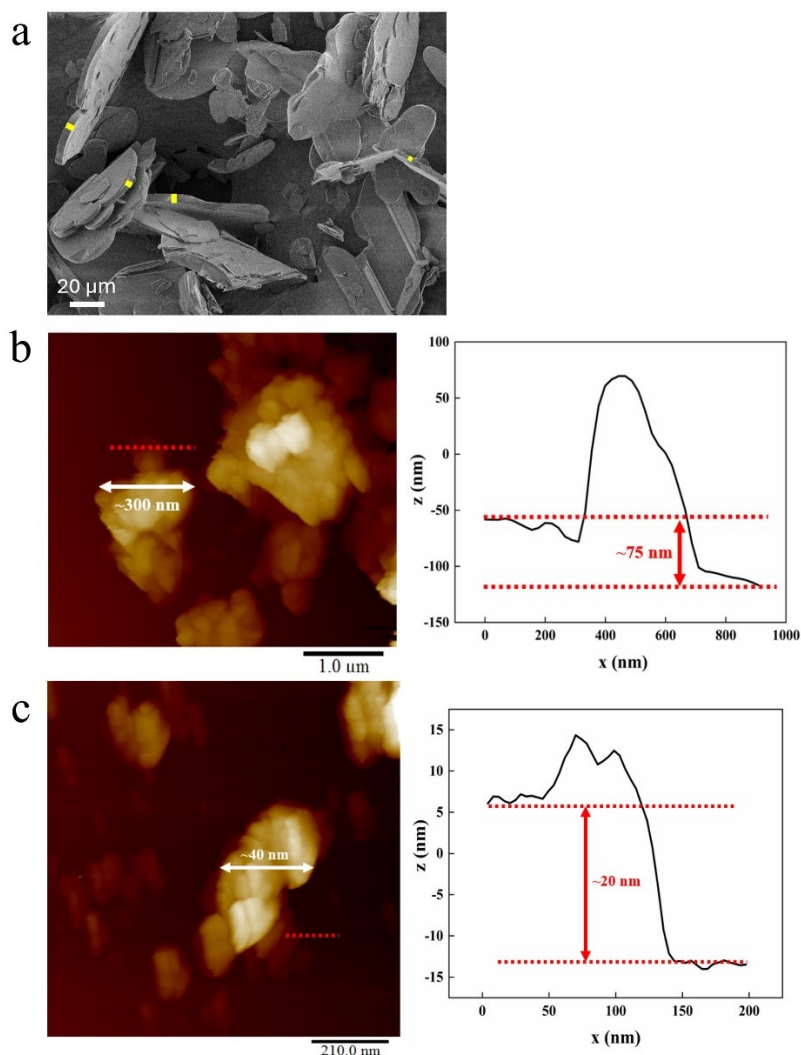

Figure S7: SEM image of bulk BN (a), AFM thickness analysis of BN milled in CO<sub>2</sub> for (b) 12h and (c) 20h.

The AFM analysis was conducted on BN milled in CO<sub>2</sub> for 12h and 20h. The starting bulk BN has lateral size and thickness of 35-60μm and 10-15μm respectively. After milling for 12h the thickness reduced to 75nm and for 20h milling it reduced to 20nm. At the same time, the reduction of lateral size was also observed. The lateral size was 300nm for 12 h milled then it reduced to 40nm for 20h milled BN. This confirms the formation of BN nanocrystallite structure to milling time.

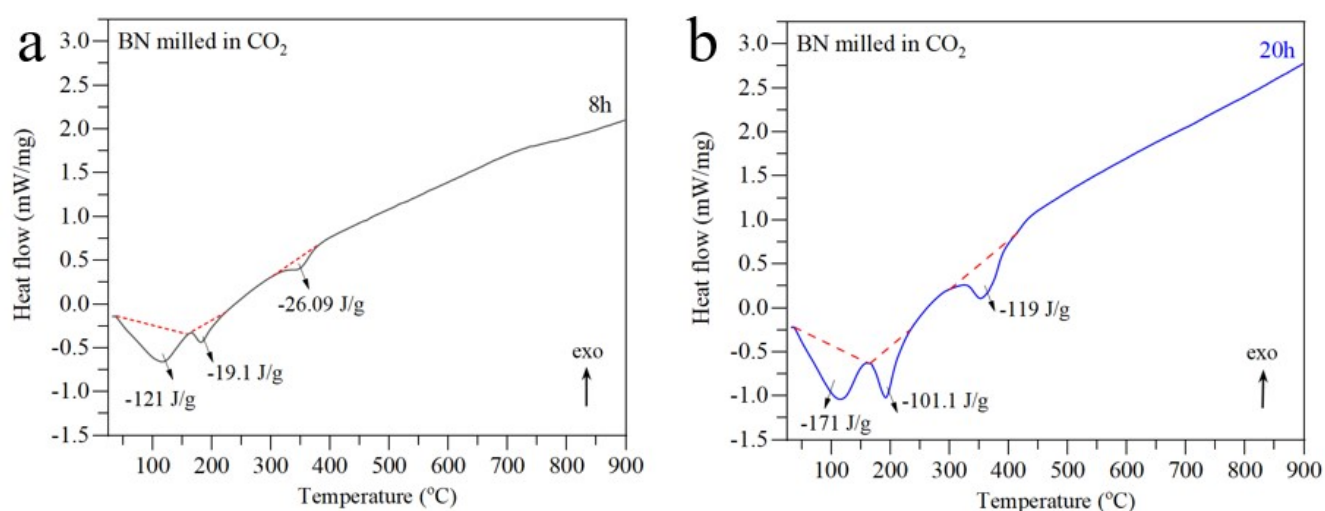

Figure S8: DSC heat flow curves of BN milled in CO<sub>2</sub> for 8h (a) and 20h (b).

Table S1: CO<sub>2</sub> uptake by different materials

| Adsorbent                                                                                                                 | CO <sub>2</sub> uptake (mmol/g) | BET surface m <sup>2</sup> /g | Selectivity                               | Reference |
|---------------------------------------------------------------------------------------------------------------------------|---------------------------------|-------------------------------|-------------------------------------------|-----------|
| Boron Nitride                                                                                                             | 26.2                            | 307.7                         |                                           | This work |
| Inorganic                                                                                                                 |                                 |                               |                                           |           |
| Novel Li <sub>4</sub> SiO <sub>4</sub> -based sorbents containing LiAlO <sub>2</sub> and Li <sub>2</sub> SiO <sub>3</sub> | 4.317                           | 6.1                           | -                                         | [1]       |
| CeO <sub>2</sub> based sorbent                                                                                            | 1.087                           | 199                           | -                                         | [2]       |
| MgO based sorbents                                                                                                        | 2.27                            | 2.71                          |                                           | [3]       |
| Na <sub>2</sub> CO <sub>3</sub> -CaO                                                                                      | 2.43                            | 13.49                         | -                                         | [4]       |
| CaO particles into a 3D mesoporous silica (KIT-6) (CaK-2)                                                                 | 7.58                            | 2.9                           | -                                         | [5]       |
| Organic                                                                                                                   |                                 |                               |                                           |           |
| Porous carbon xerogels hexamethylenetetramine (HTM)                                                                       | 2.89                            | 963                           | -                                         | [6]       |
| MOF-200/GO                                                                                                                | 1.338                           | 3359                          | 18.37 (CO <sub>2</sub> /CH <sub>4</sub> ) | [7]       |
| PEI-purine-CNT                                                                                                            | 3.79                            | -                             | -                                         | [8]       |
| 20PEI/CNT@NanoZ/Cd                                                                                                        | 5.7                             | 403                           | -                                         | [9]       |
| Copper grafted, 3-aminopropyltriethoxysilane GO                                                                           | 8.10                            | -                             | -                                         | [10]      |
| 2,4,6-Tris(bromomethyl) mesitylene, paraphenylenediamine, KOH activation                                                  | 8.08                            | 1033                          | 19 (CO <sub>2</sub> /CH <sub>4</sub> )    | [11]      |
| Divinylbenzene, p-vinylbenzyl chloride, CCl <sub>4</sub> , KOH activation                                                 | 6.88                            | 1138                          | 30.3 (CO <sub>2</sub> /N <sub>2</sub> )   | [12]      |

Table S2:

| Milling time (hr)  | CO /N |       | CO /CH |       |
|--------------------|-------|-------|--------|-------|
|                    | % CO  | % N   | % CO   | % CH  |
| Before milling     | 20.00 | 80.00 | 20.00  | 80.00 |
| After 2.5h milling | 9.98  | 90.02 | 12.53  | 87.47 |
| After 5h milling   | 0.44  | 99.56 | 7.17   | 92.83 |
| After 5.5h milling | 0     | 100   |        |       |
| After 6h milling   |       |       | 0      | 100   |

### Supporting information References:

- 1 S. C. Lee et al., "Novel regenerable solid sorbents based on lithium orthosilicate for carbon dioxide capture at high temperatures," *Sep. Purif. Technol.*, vol. 214, pp. 120-127, 2019/05/01/ 2019, doi: <https://doi.org/10.1016/j.seppur.2018.05.018>.
- 2 C. Slostowski, S. Marre, P. Dagault, O. Babot, T. Toupance, and C. Aymonier, "CeO<sub>2</sub> nanopowders as solid sorbents for efficient CO<sub>2</sub> capture/release processes," *Journal of CO<sub>2</sub> Utilization*, vol. 20, pp. 52-58, 2017/07/01/ 2017, doi: <https://doi.org/10.1016/j.jcou.2017.03.023>.
- 3 Y. Hu, X. Liu, Z. Zhou, W. Liu, and M. Xu, "Pelletization of MgO-based sorbents for intermediate temperature CO<sub>2</sub> capture," *Fuel*, vol. 187, pp. 328-337, 2017/01/01/ 2017, doi: <https://doi.org/10.1016/j.fuel.2016.09.066>.
- 4 C. H. Lee et al., "Na<sub>2</sub>CO<sub>3</sub>-doped CaO-based high-temperature CO<sub>2</sub> sorbent and its sorption kinetics," *Chemical Engineering Journal*, vol. 352, pp. 103-109, 2018/11/15/ 2018, doi: <https://doi.org/10.1016/j.cej.2018.06.141>.
- 5 H. Sun et al., "Development of Ca/KIT-6 adsorbents for high temperature CO<sub>2</sub> capture," *Fuel*, vol. 235, pp. 1070-1076, 2019/01/01/ 2019, doi: <https://doi.org/10.1016/j.fuel.2018.07.044>.
- 6 S. Wang, Y. Xu, M. Yan, L. Zhang, and Z. Liu, "The effect of surfactants on carbon xerogel structure and CO<sub>2</sub> capture," *Journal of Non-Crystalline Solids*, vol. 499, pp. 101-106, 2018/11/01/ 2018, doi: <https://doi.org/10.1016/j.jnoncrysol.2018.07.023>.
- 7 S. Ullah et al., "Influence of post-synthetic graphene oxide (GO) functionalization on the selective CO<sub>2</sub>/CH<sub>4</sub> adsorption behavior of MOF-200 at different temperatures; an experimental and adsorption isotherms study," *Microporous and Mesoporous Materials*, vol. 296, p. 110002, 2020/04/01/ 2020, doi: <https://doi.org/10.1016/j.micromeso.2020.110002>.
- 8 M. Deng and H. G. Park, "Spacer-Assisted Amine-Coiled Carbon Nanotubes for CO<sub>2</sub> Capture," *Langmuir*, vol. 35, no. 13, pp. 4453-4459, 2019/04/02 2019, doi: 10.1021/acs.langmuir.8b03980.
- 9 S. Salehi, M. Anbia, A. H. Hosseiny, and M. Sepehrian, "Enhancement of CO<sub>2</sub> adsorption on polyethylenimine functionalized multiwalled carbon nanotubes/Cd-nanozeolite composites," *Journal of Molecular Structure*, vol. 1173, pp. 792-800, 2018/12/05/ 2018, doi: <https://doi.org/10.1016/j.molstruc.2018.07.056>.
- 10 P. Bhanja, S. K. Das, A. K. Patra, and A. Bhaumik, "Functionalized graphene oxide as an efficient adsorbent for CO<sub>2</sub> capture and support for heterogeneous catalysis," *RSC Advances*, 10.1039/C6RA13590K vol. 6, no. 76, pp. 72055-72068, 2016, doi: 10.1039/C6RA13590K.
- 11 Y.-C. Lou et al., "Solvent-free synthesis of N-containing polymers with high cross-linking degree to generate N-doped porous carbons for high-efficiency CO<sub>2</sub> capture," *Chemical Engineering Journal*, vol. 399, p. 125845, 2020/11/01/ 2020, doi: <https://doi.org/10.1016/j.cej.2020.125845>.
- 12 Y. Sang, G. Chen, and J. Huang, "Oxygen-rich porous carbons from carbonyl modified hyper-cross-linked polymers for efficient CO<sub>2</sub> capture," *Journal of Polymer Research*, vol. 27, no. 2, p. 36, 2020/01/13 2020, doi: 10.1007/s10965-020-2009-9.
